# Supplementary material for: Lengthening sleep reduces pain in childhood arthritis: a crossover randomised controlled trial
Source: PubMed Central journal article supplement — RMD Open. 2023 Oct 31;9(4):e003352. doi: 10.1136/rmdopen-2023-003352 (PMC10619109; doi:10.1136/rmdopen-2023-003352), 2023-10-31
Supplement: rmdopen-2023-003352supp001.pdf [file rmdopen-2023-003352supp001.pdf]

## APPENDIX

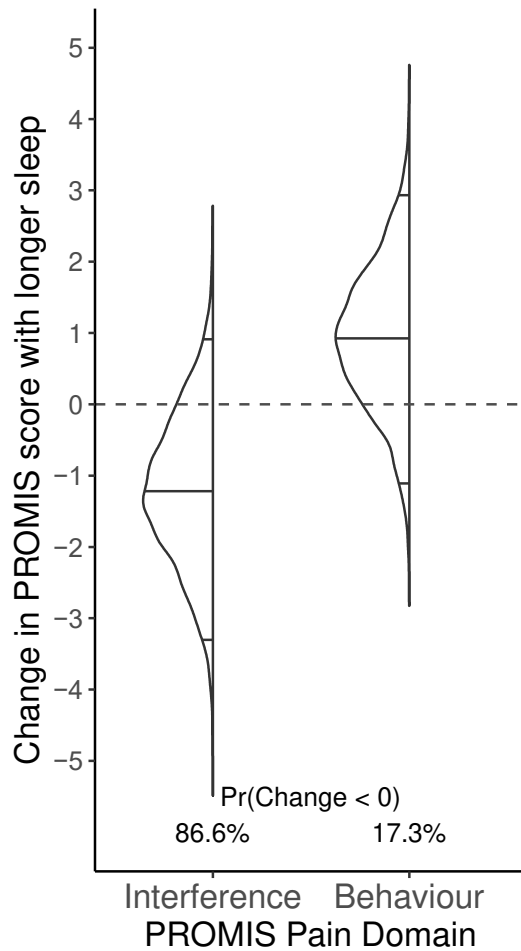

**Appendix Figure 1.** Posterior density plots (rotated 90 degrees) for PROMIS Pain Interference and Pain Behaviour. Please see figure 3c for a description of posterior density plots.

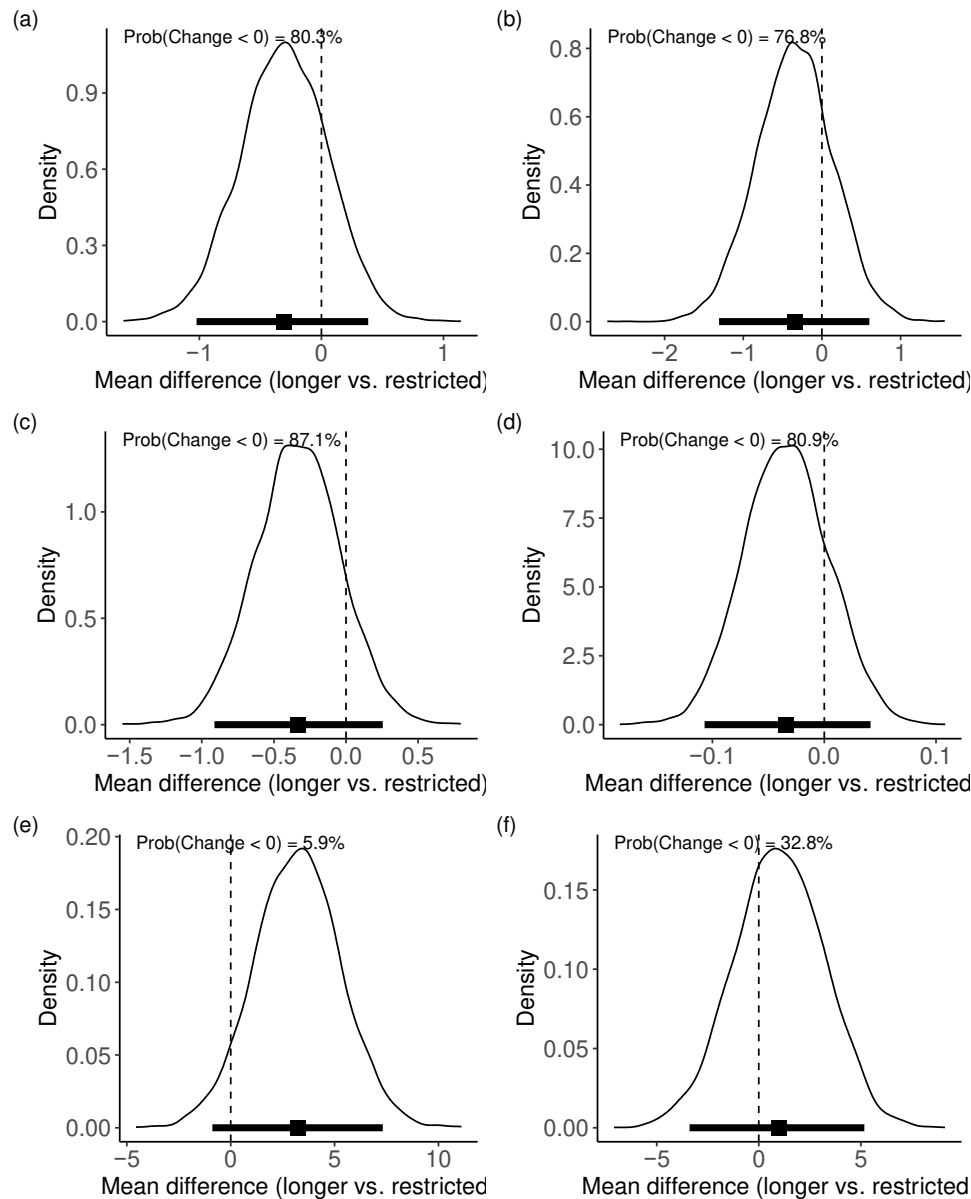

**Appendix Figure 2.** Posterior density plots for (a) active joint count, (b) physician global assessment of disease activity, (c) patient global assessment of disease activity, (d) CHAQ score, (e) quality of life (QoL) score, (f) HRQoL score. These outcomes are all on a different scale, so are shown on different plots. Please see figure 3c for a description of posterior density plots.
